# Supplementary material for: Chronic hepatitis C liver microenvironment: role of the Th17/Treg interplay related to fibrogenesis
Source: PubMed Central journal article supplement (PMC5643436; doi:10.1038/s41598-017-13777-3), 2017-10-16
Supplement: 41598_2017_13777_MOESM1_ESM.pdf [file 41598_2017_13777_MOESM1_ESM.pdf]

1 **Chronic hepatitis C liver microenvironment: role of the Th17/Treg interplay related to fibrogenesis**

2 Daniela Alejandra Rios<sup>a\*‡</sup>, Pamela Valva<sup>a‡</sup>, Paola Cecilia Casciato<sup>b</sup>, Silvia Frias<sup>c</sup>, María Soledad Caldirola<sup>d</sup>,  
3 María Isabel Gaillard<sup>d</sup>, Liliana Bezrodnik<sup>d</sup>, Juan Bandi<sup>b</sup>, Omar Galdame<sup>b</sup>, Beatriz Ameigeiras<sup>c</sup>, Diana  
4 Krasniansky<sup>e</sup>, Carlos Brodersen<sup>e</sup>, Eduardo Mullen<sup>f</sup>, Elena Noemí De Matteo<sup>a</sup>, María Victoria Preciado<sup>a</sup>.

5 <sup>‡</sup> Equally contributed

6  
7  
8 <sup>a</sup> Instituto Multidisciplinario de Investigaciones en Patologías Pediátricas (IMIPP- CONICET-GCBA)

9 Laboratorio de Biología Molecular, División Patología, Hospital de Niños Ricardo Gutiérrez, Gallo 1330,  
10 C1425EFD, Buenos Aires, Argentina.

11 <sup>b</sup> Unidad de Hepatología, Hospital Italiano de Buenos Aires; Juan D Perón 4190, C1181ACH, Buenos Aires,  
12 Argentina.

13 <sup>c</sup> Unidad de Hepatología, Hospital Ramos Mejía; Urquiza 609, CP1221, Buenos Aires, Argentina.

14 <sup>d</sup> Instituto Multidisciplinario de Investigaciones en Patologías Pediátricas (IMIPP- CONICET-GCBA),  
15 Departamento de Inmunología, Hospital de Niños Ricardo Gutiérrez; Gallo 1330 C1425EFD, Buenos Aires,  
16 Argentina.

17 <sup>e</sup> Unidad de Hepatología, Hospital General de Agudos "Carlos G. Durand"; Av Díaz Vélez 5044,  
18 C1405DCS, Buenos Aires, Argentina

19 <sup>f</sup> División Patología, Hospital Italiano de Buenos Aires; Juan D Perón 4190, C1181ACH, Buenos Aires,  
20 Argentina.

21

22 \* **Corresponding author:** Daniela Alejandra Ríos; Instituto Multidisciplinario de Investigaciones en  
23 Patologías Pediátricas (IMIPP- CONICET-GCBA) Laboratorio de Biología Molecular, División Patología,  
24 Hospital de Niños Ricardo Gutiérrez, Gallo 1330, C1425EFD, Buenos Aires, Argentina. Fax: +54-11-4962-  
25 9138. E-mail: rios.daniela.89@gmail.com

**Supplementary table S1: Primer sequences used in SybrGreen qRT-PCR**

| <b>Target</b>                   | <b>Primer Sequences (5'-3')</b> | <b>Product Length (nt)</b> |
|---------------------------------|---------------------------------|----------------------------|
| <b>IL-10</b>                    | F GCTGTCATCGATTTCTTCCC          | 111                        |
|                                 | R ACAAAGCCATGAGTGAGTTTGA        |                            |
| <b>IL-17A</b>                   | F AACGATGACTCCTGGGAAGAC         | 99                         |
|                                 | R CCTGGATTTTCGTGGGATTGTG        |                            |
| <b>TGF-<math>\beta</math></b>   | F CTCCAGCCGAGGTCCTT             | 92                         |
|                                 | R CCCTGGACACCAACTATTGC          |                            |
| <b>IL-6</b>                     | F AGTGAGGAACAAGCCAGAGC          | 99                         |
|                                 | R GTCAGGGGTGGTTATTGCAT          |                            |
| <b>IFN-<math>\gamma</math></b>  | F GAGTGTGGAGACCATCAAGGA         | 127                        |
|                                 | R GTATTGCTTTGCGTTGGACA          |                            |
| <b>TNF-<math>\alpha</math></b>  | F CTGCTGCACTTTGGAGTGAT          | 93                         |
|                                 | R AGATGATCTGACTGCCTGGG          |                            |
| <b>HPRT</b>                     | F ATGGGAGGCCATCACATTGT          | 77                         |
|                                 | R ATGTAATCCAGCAGGTCAGCAA        |                            |
| <b><math>\beta</math>-actin</b> | F CCACACTGTGCCCATCTACG          | 131                        |
|                                 | R CCGTGGTGGTGAAGCTGTAG          |                            |

F: forward primer; R: reverse primer

**Panel 1**

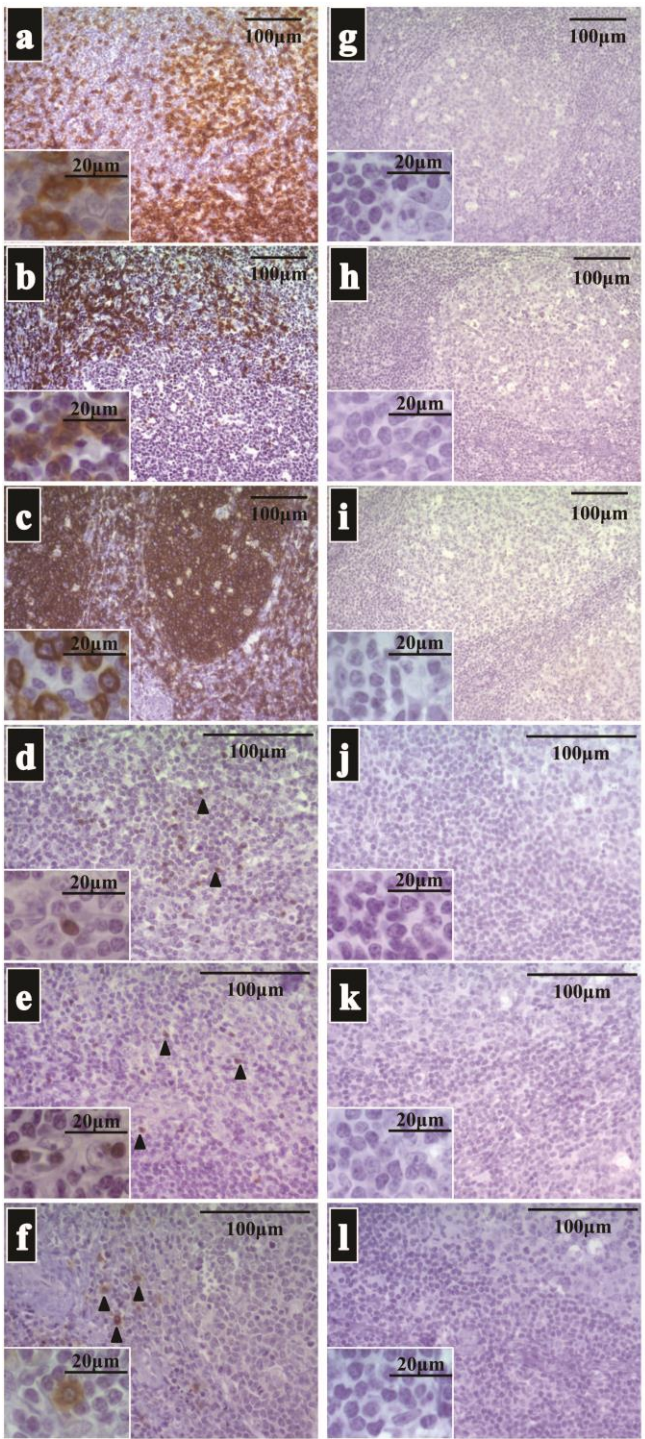

**Panel 2**

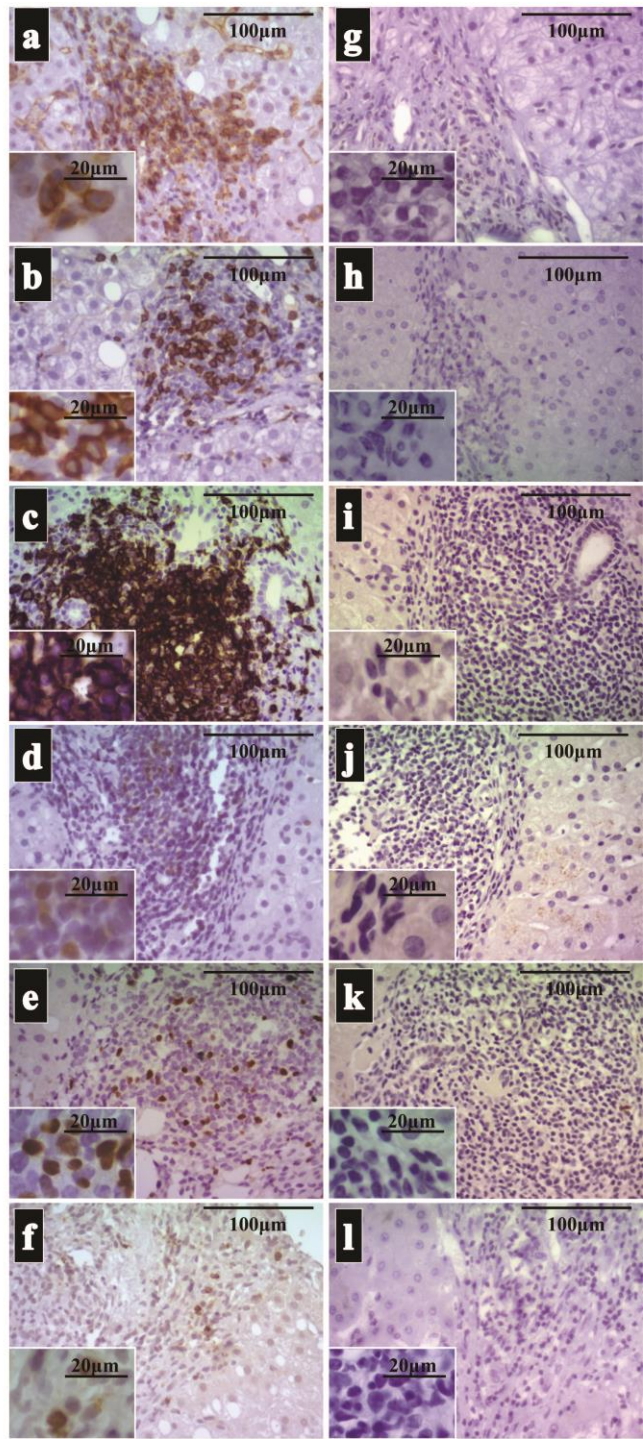

31

32 **Supplementary Fig. 1 CD4<sup>+</sup>, CD8<sup>+</sup>, CD20<sup>+</sup>, Tbet<sup>+</sup>, Foxp3<sup>+</sup>, IL-17A<sup>+</sup> lymphocytes immunostaining.**

33 Panel 1 shows positive and isotype controls on tonsil sections. Panel 2 shows positive and isotype controls  
 34 on liver sections. a) CD4<sup>+</sup>, b) CD8<sup>+</sup>, c) CD20<sup>+</sup>, d) Tbet<sup>+</sup>, e) Foxp3<sup>+</sup>, and f) IL-17A<sup>+</sup> lymphocytes. g), h), i),  
 35 j), k) and l) show the isotype controls for a), b), c), d), e) and f), respectively.

36

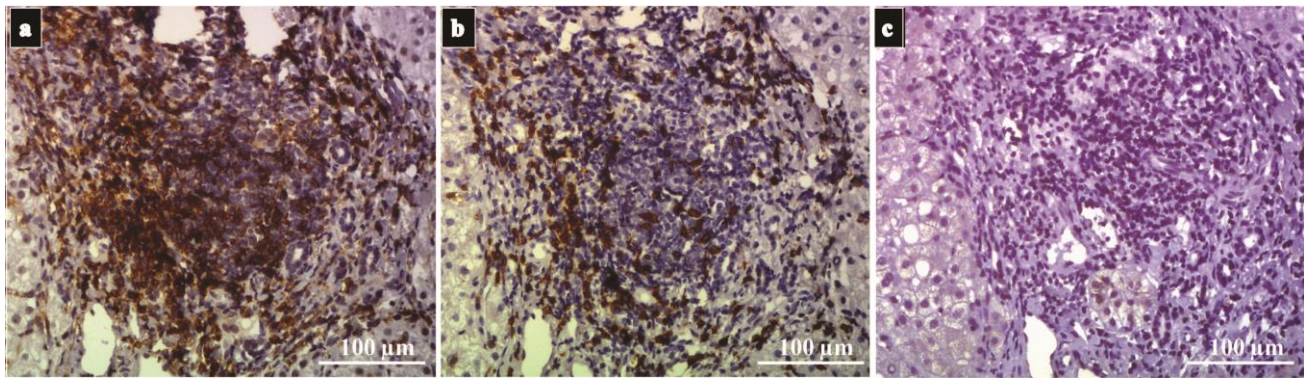

39 **Supplementary Fig. 2 CD4<sup>+</sup> and CD8<sup>+</sup> lymphocytes distribution in P-P/I areas.** A portal infiltrate  
40 showing a) CD4<sup>+</sup> lymphocytes in the centre and interface area b) CD8<sup>+</sup> lymphocytes with peripheral  
41 localization within the lymphoid aggregate and c) isotype control.

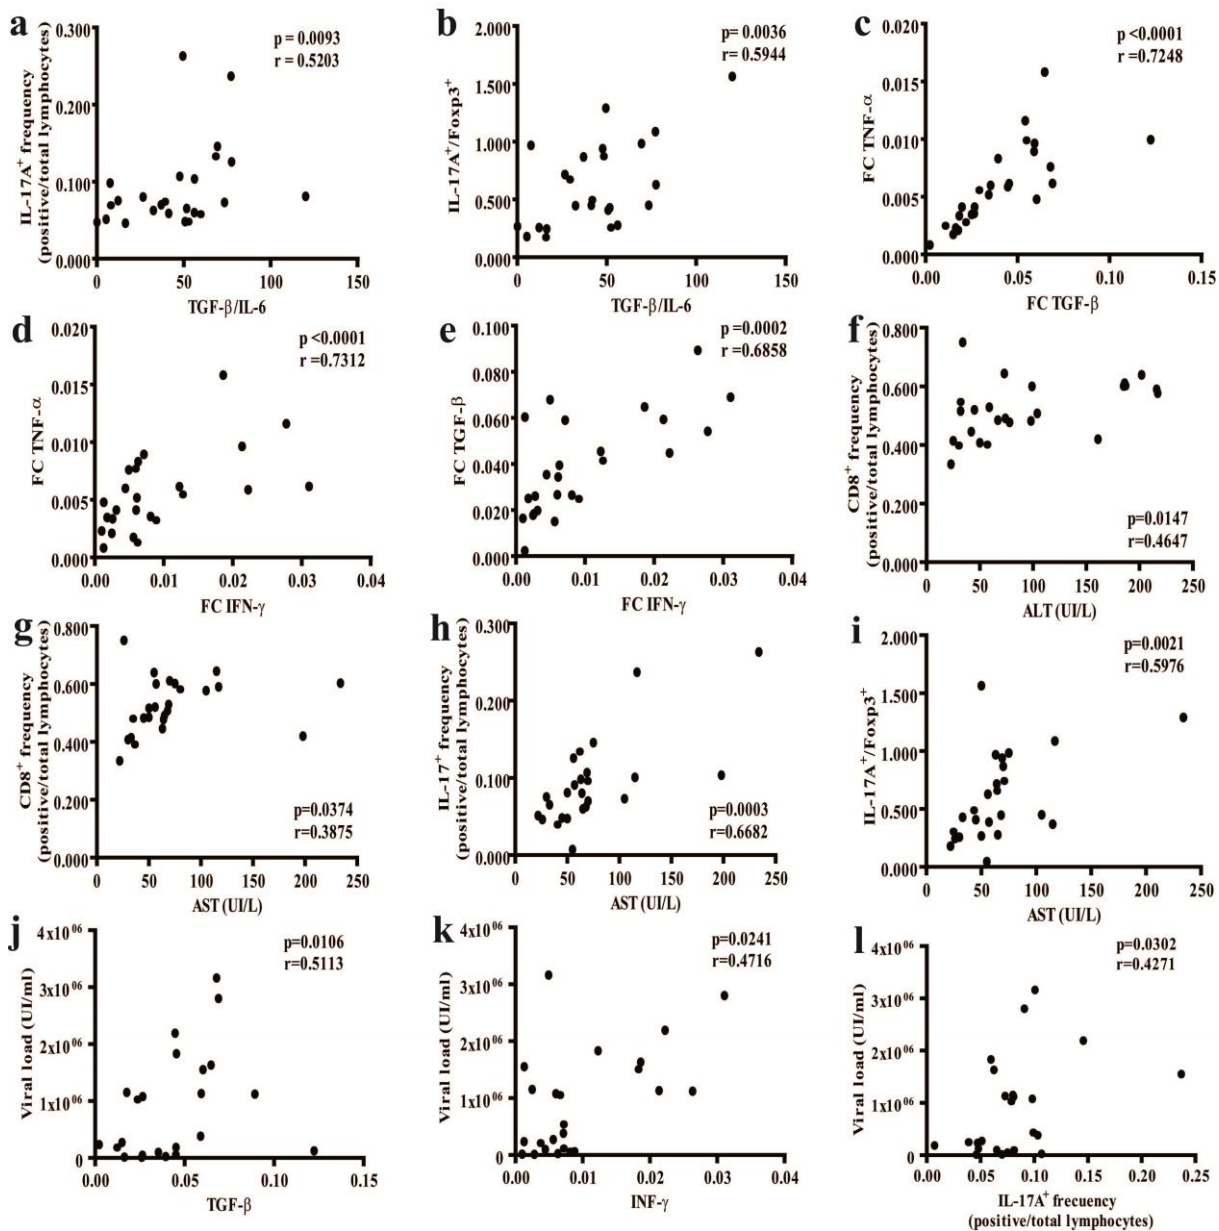

43  
 44 **Supplementary Fig. 3 Correlation among cytokine expression levels, intrahepatic lymphocyte**  
 45 **frequency, clinical, and virological parameters of CHC patients.** a) Correlation between IL-17A<sup>+</sup>  
 46 lymphocyte frequency and TGF-β/IL-6 ratio; b) Correlation between IL-17A<sup>+</sup>/Foxp3<sup>+</sup> lymphocytes ratio and  
 47 TGF-β/IL-6 ratio, c-e) correlation among TNF-α, IFN-γ and TGF-β expression level; f- i) correlation  
 48 between transaminase level and CD8<sup>+</sup> lymphocyte frequency, IL-17A<sup>+</sup> lymphocyte frequency and IL-  
 49 17A<sup>+</sup>/Foxp3<sup>+</sup> lymphocytes ratio, respectively; j-l) correlation between viral load and TGF-β, IFN-γ, and IL-  
 50 17A<sup>+</sup> lymphocyte frequency, respectively. Frequencies were calculated as immunostained P-P/I  
 51 lymphocytes/ total P-P/I lymphocytes in all portal tracts of the tissue section (400×). FC: fold change.  
 52 Spearman's nonparametric correlation (a, d-l) and Pearson's correlation coefficient (b and c) were used to  
 53 measure the degree of association between the studied parameters.

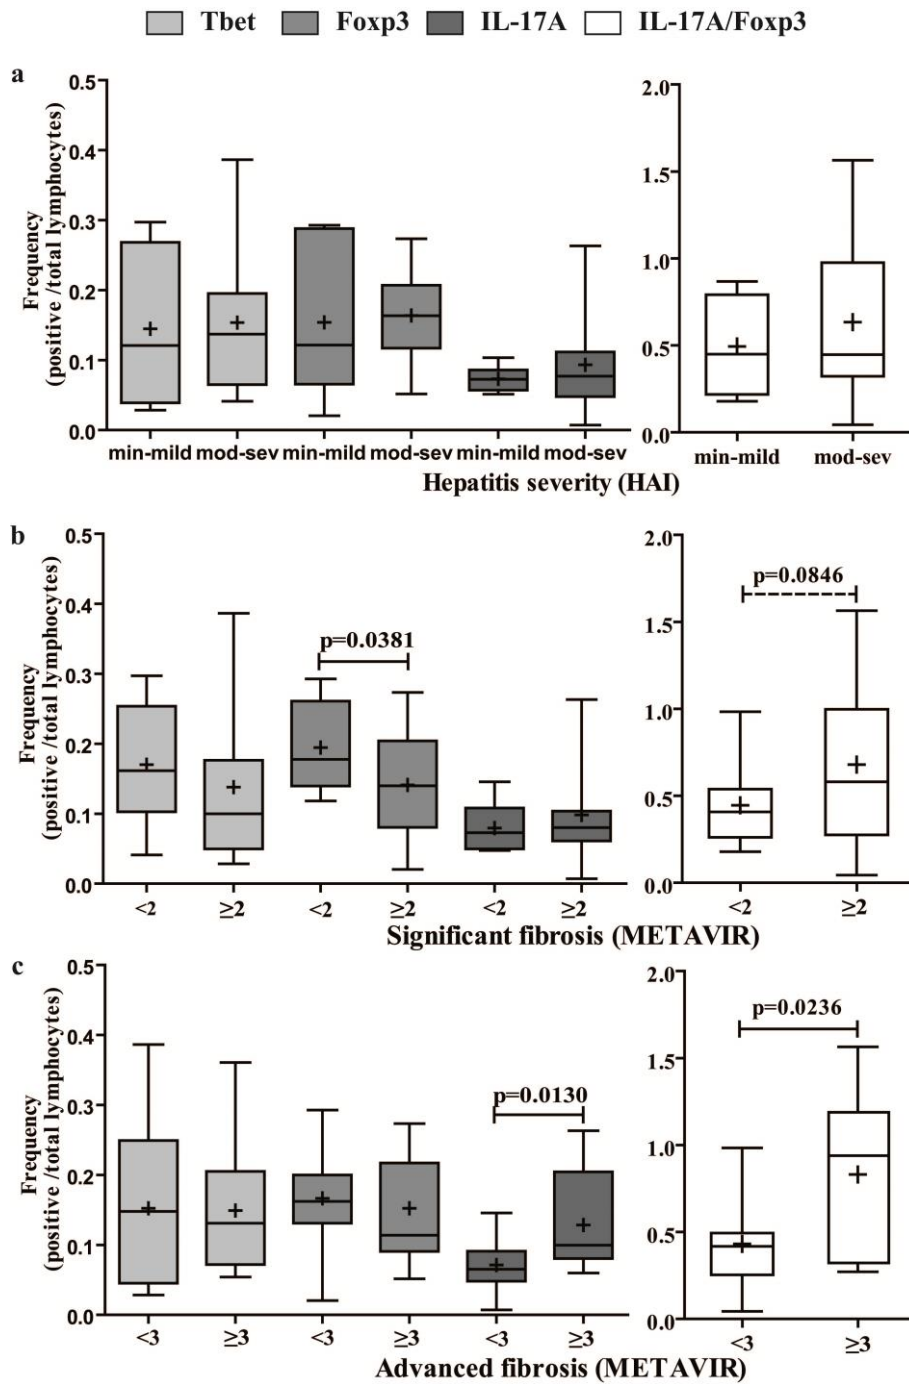

54

55 **Supplementary Fig. 4 Intrahepatic Th subsets frequency related to histological liver damage**  
 56 **parameters.** Tbet<sup>+</sup>, Foxp3<sup>+</sup>, IL-17A<sup>+</sup> lymphocyte frequency as well as IL-17A<sup>+</sup>/Foxp3<sup>+</sup> ratio related to a)  
 57 hepatitis severity, b) significant and c) advanced fibrosis. Hepatitis severity (min: minimal; mod: moderate,  
 58 sev: severe) according to HAI. Significant (F ≥2) and advanced (F ≥3) fibrosis according to METAVIR. The  
 59 results are depicted in box plots. Horizontal lines within boxes indicate medians. Horizontal lines outside the  
 60 boxes represent the 5 and 95 percentiles. Mean is indicated as +. Frequencies were calculated as  
 61 immunostained P-P/I lymphocytes/ total P-P/I lymphocytes in all portal tracts of the tissue section (400×).  
 62 The Mann-Whitney U-test and unpaired t-test were used to compare sets of data..

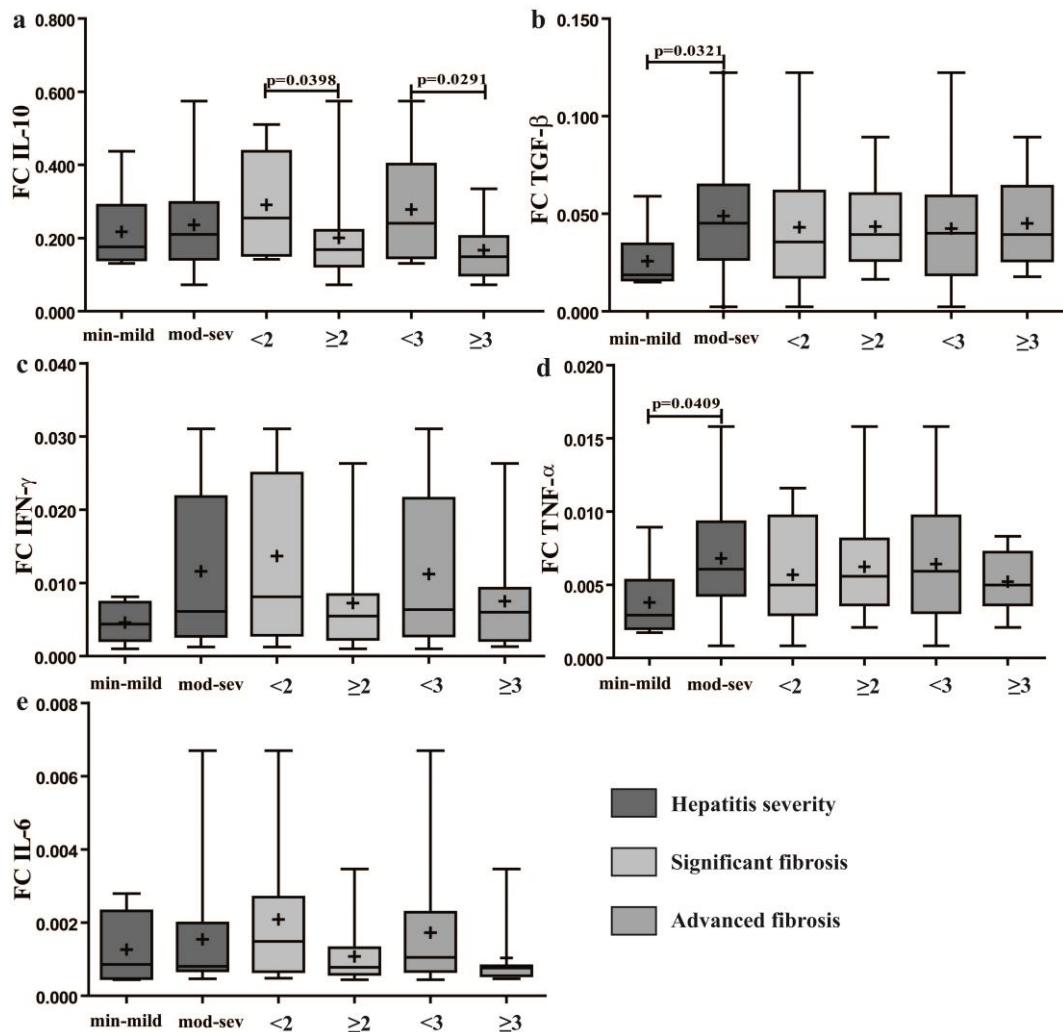

Supplementary Fig. 5 Cytokine expression levels in the liver milieu of CHC patients related to liver damage. a) IL-10, b) TGF-β, c) IFN-γ, d) TNF-α, and e) IL-6 expression levels related to hepatitis severity, significant and advanced fibrosis. Hepatitis severity (min: minimal; mod: moderate, sev: severe) according to HAI. Significant (F ≥2) and advanced (F ≥3) fibrosis according to METAVIR. The results are depicted in box plots. Horizontal lines within boxes indicate medians. Horizontal lines outside the boxes represent the 5 and 95 percentiles. Mean is indicated as +. FC: fold change. The Mann-Whitney U-test and unpaired t-test were used to compare sets of data.

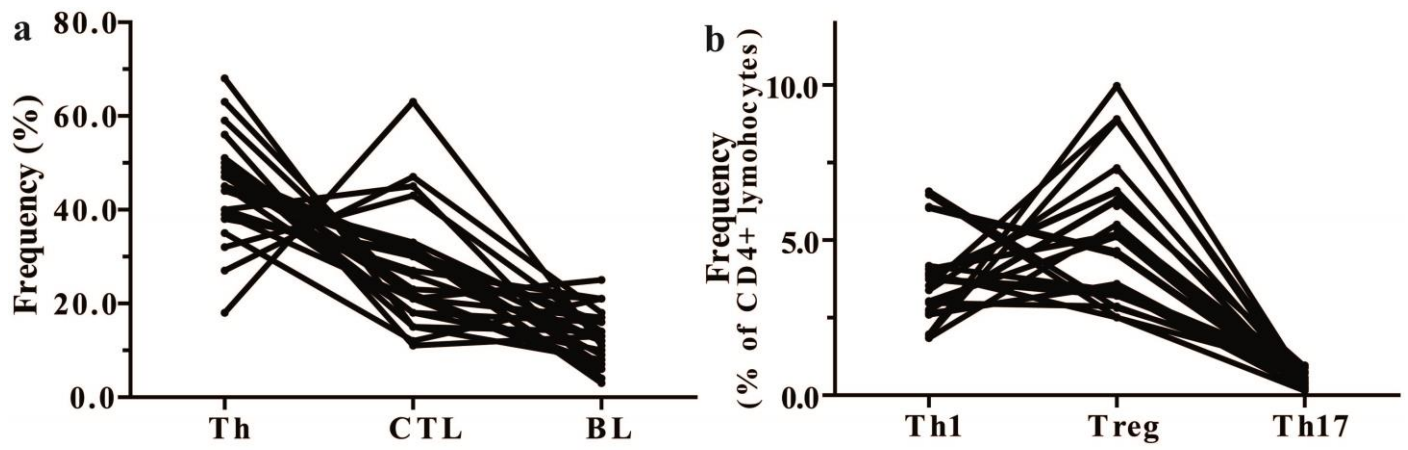

72

73 **Supplementary Fig. 6** Peripheral lymphocyte populations in CHC patients. a)Th, CTLs and B  
 74 lymphocytes frequency for each patient, b) Th1, Treg and Th17 lymphocytes frequency for each patient.

75

76



Panel 1

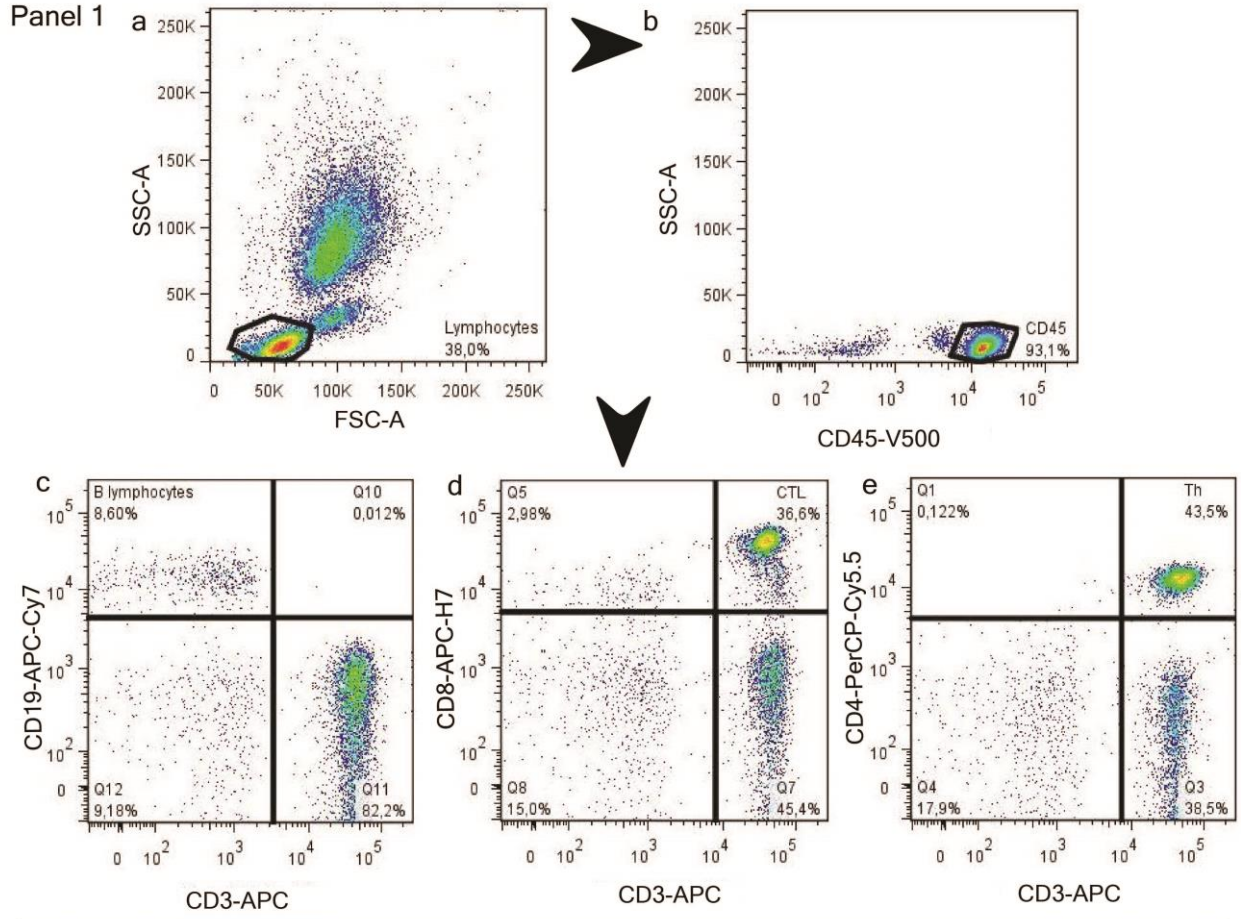

Panel 2

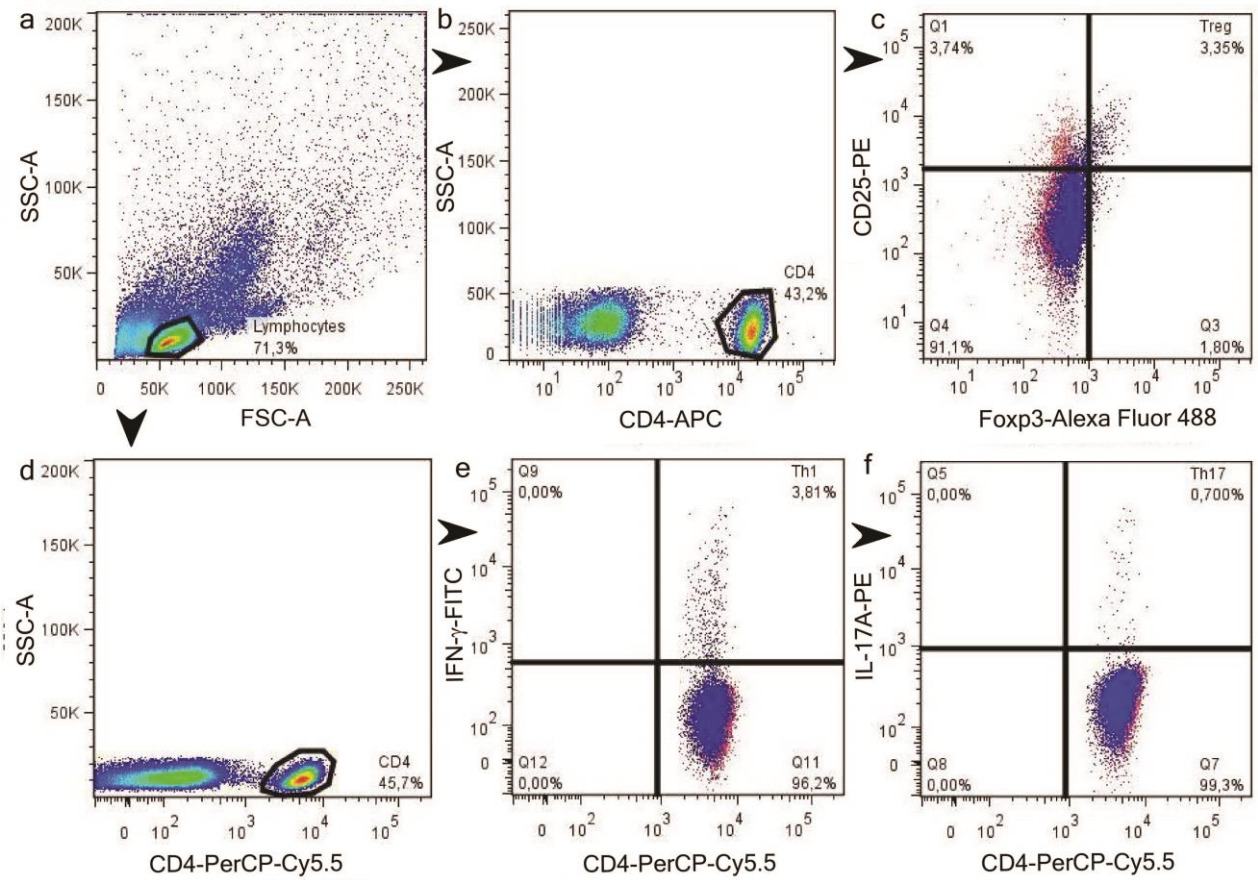

78 **Supplementary Fig. 7 Gating strategies for flow cytometry analysis.** Panel 1: B lymphocytes, CTLs and  
79 Th frequency on fresh heparinized blood. Lymphocyte selection by a) SSC-A and FSC-A, and b) CD45  
80 expression. Lymphocyte characterization by c) CD3-CD19<sup>+</sup> (B lymphocytes), d) CD3<sup>+</sup>CD8<sup>+</sup> (CTL) and e)  
81 CD3<sup>+</sup>CD4<sup>+</sup> (Th cells). The percentage of each population is indicated. Panel 2: Th subpopulations on  
82 PBMCs sample. a) lymphocyte selection by SSC-A and FSC-A, b) CD4<sup>+</sup> lymphocytes selection for Treg  
83 characterization, c) CD4<sup>+</sup>CD25<sup>hi</sup>Foxp3<sup>+</sup> (Treg) cells identification (blue) (isotype control staining is also  
84 shown in red), d) CD4<sup>+</sup> lymphocytes selection for Th1 and Th17 characterization; e) CD4<sup>+</sup>/IFN- $\gamma$ <sup>+</sup> (Th1)  
85 lymphocytes and f) CD4<sup>+</sup>/IL-17A<sup>+</sup> (Th17) lymphocytes identification after anti-CD3/IL-2 stimulation (blue)  
86 (unstimulated PBMCs are also shown in red). The percentage of each population is indicated.
